# Supplementary material for: Intersexual chemo-sensation in a “visually-oriented” lizard, Anolis sagrei
Source: PubMed Central journal article supplement (PMC4824904; doi:10.7717/peerj.1874), 2016-03-29
Supplement: peerj-04-1874-s001.pdf [file peerj-04-1874-s001.pdf]

**Table with descriptive statistics for the behavioural traits scored** – Descriptive statistics for the display behaviour and exploratory activity in male *Anolis sagrei* when introduced in an untreated control terrarium ('control') and an experimental terrarium previously inhabited by conspecific females ('exper').

|                                     | <b>Behavioural trait</b>  | <b>average</b> | <b>SE</b> | <b>n</b> |
|-------------------------------------|---------------------------|----------------|-----------|----------|
| frequency (counts / min)            | DE (control)              | 0.082          | 0.036     | 14       |
|                                     | DE (exper)                | 0.250          | 0.069     | 14       |
|                                     | HN (control)              | 0.039          | 0.018     | 14       |
|                                     | HN (exper)                | 0.154          | 0.038     | 14       |
|                                     | PU (control)              | 0.039          | 0.016     | 14       |
|                                     | PU (exper)                | 0.050          | 0.018     | 14       |
|                                     | TE (control)              | 0.214          | 0.023     | 14       |
|                                     | TE (exper)                | 0.425          | 0.065     | 14       |
| mean amount of time spent (seconds) | Display beh. (control)    | 2.831          | 1.164     | 14       |
|                                     | Display beh. (exper)      | 12.742         | 3.305     | 14       |
|                                     | Locomotion beh. (control) | 12.530         | 2.214     | 14       |
|                                     | Locomotion beh. (exper)   | 46.113         | 4.680     | 14       |

DE, dewlap extension; HN, head-nod; PU, push-up; TE, tongue extrusion; SE, standard error
